# Supplementary material for: Disaggregation-induced resurgence of quenched emission of a self-assembled bis-indole system: photophysics, energetics, and dynamics
Source: Royal Society of Chemistry journal article supplement (doi:10.1039/d3cp00105a), 2023-01-01
Supplement: d3cp00105a1.pdf [file d3cp00105a1.pdf]

## Electronic Supplementary Information (ESI)

### **Disaggregation-induced resurgence of quenched emission of a self-assembled bis-indole system: Photophysics, energetics, and dynamics**

Provakar Paul,<sup>a</sup> Saikat Samanta,<sup>a</sup> Arunavo Chatterjee,<sup>b</sup> Arabinda Mallick\*<sup>c</sup> and Tapas Majumdar\*<sup>a</sup>

<sup>a</sup>*Department of Chemistry, University of Kalyani, Nadia, West Bengal, India – 741235*

<sup>b</sup>*Department of Chemical Sciences, Indian Institute of Science Education and Research (IISER)–Kolkata, Mohanpur, West Bengal, India – 741246*

<sup>c</sup>*Department of Chemistry, Kazi Nazrul University, Asansol, West Bengal, India – 713340*

**E-mail:** <sup>c</sup>ampcju@yahoo.co.in; <sup>a</sup>tapasmju@gmail.com

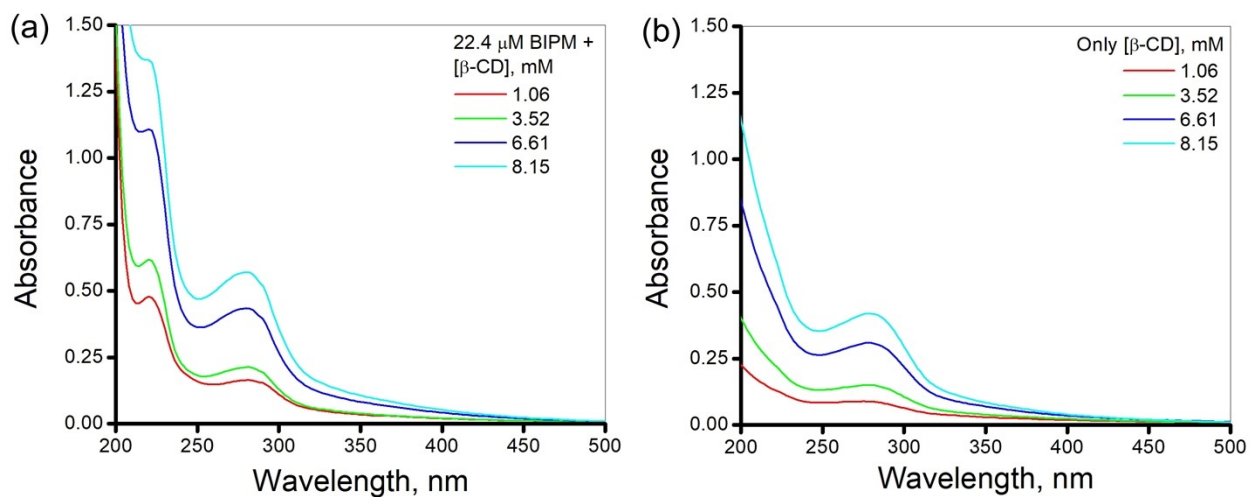

**Fig. S1** (a) Change in the absorption spectrum of BIPM with gradual addition of  $\beta$ -CD and (b) absorption spectrum of only  $\beta$ -CD with its increasing concentration; in pure water, Temp. 298 K.

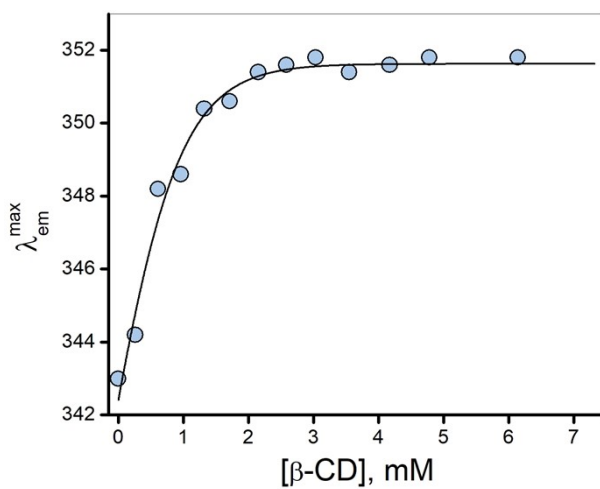

**Fig. S2** Shift in the emission maximum of BIPM with gradual addition of  $\beta$ -CD in pure water;  $\lambda_{ex} = 280$  nm, [BIPM] = 22.4  $\mu$ M, Temp. 298 K.

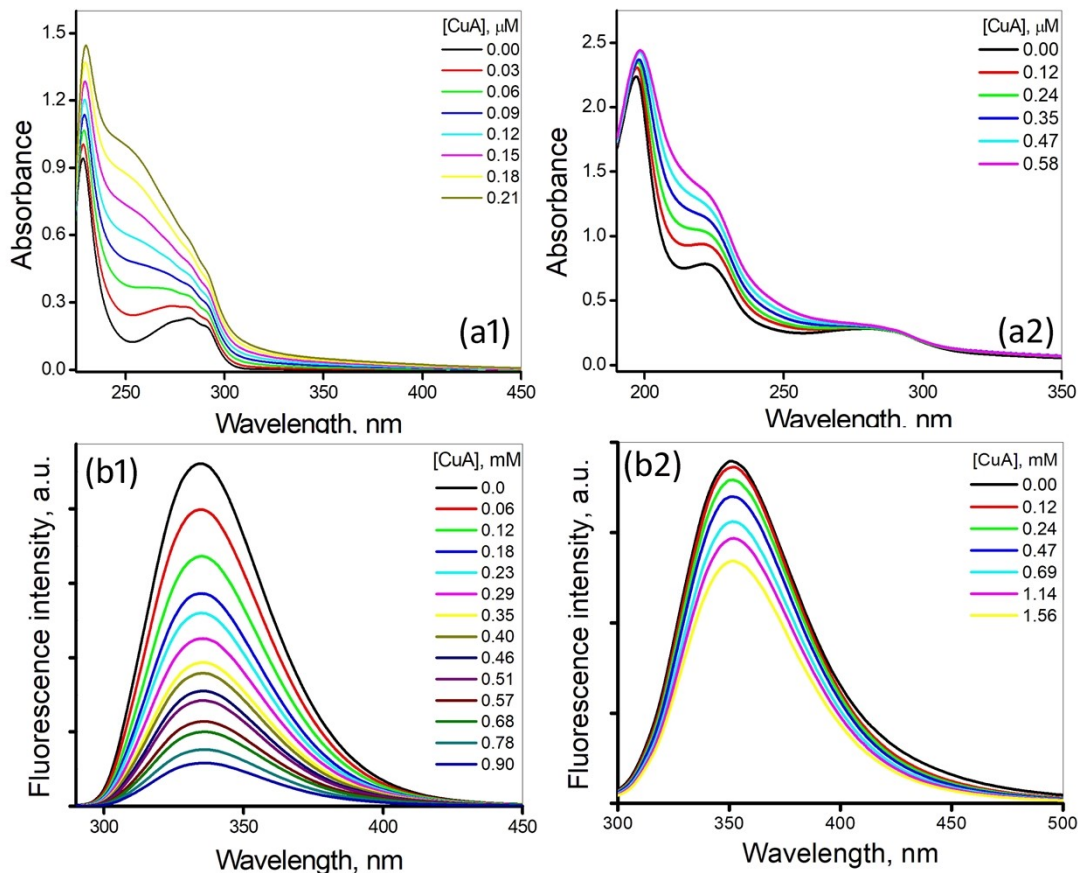

**Fig. S3** Change in the absorbance of (a1) BIPM in pure DiOx and (a2) BIPM- $\beta$ -CD in pure water on interaction with  $\text{Cu}(\text{OAc})_2$  quencher; Change in the fluorescence of (b1) BIPM in pure DiOx and (b2) BIPM- $\beta$ -CD in pure water on interaction with  $\text{Cu}(\text{OAc})_2$  quencher;  $\lambda_{\text{ex}} = 280$  nm,  $[\text{BIPM}] = 22.4$   $\mu\text{M}$ ,  $[\beta\text{-CD}] = 4.75$  mM, Temp. 298 K.

**Table S1** Time-resolved decay parameters of BIPM at different  $\beta$ -CD concentration on excitation at 280 nm and monitoring at emission maxima.  $\chi^2$  represents the goodness of fitting and the data are within  $\pm 5\%$  error limit.

| $[\beta\text{-CD}], \text{mM}$ | $T_1, \text{ns}$ | $A_1$ | $T_2, \text{ns}$ | $A_2$ | $T_{\text{avr}}, \text{ns}$ | $\chi^2$ |
|--------------------------------|------------------|-------|------------------|-------|-----------------------------|----------|
| 0.00                           | 0.25             | 70.27 | 1.36             | 29.73 | 1.03                        | 1.27     |
| 0.61                           | 0.85             | 45.09 | 2.90             | 54.91 | 2.49                        | 1.20     |
| 1.71                           | 0.89             | 24.79 | 2.85             | 75.21 | 2.66                        | 1.17     |
| 2.58                           | 1.21             | 21.35 | 2.92             | 78.65 | 2.75                        | 1.18     |
| 3.60                           | 1.31             | 20.15 | 2.93             | 79.85 | 2.77                        | 1.16     |
| 4.81                           | 0.94             | 12.16 | 2.79             | 87.84 | 2.71                        | 1.15     |
